# Supplementary material for: Stem Cell Markers CXCR-4 and CD133 Predict Aggressive Phenotype and Their Double Positivity Indicates Poor Prognosis of Oral Squamous Cell Carcinoma
Source: MDPI journal article supplement (doi:10.3390/cancers13235895), 2021-11-23
Supplement: s1 [file s1]

# Supplementary Material: Stem Cell Markers CXCR-4 and CD133 Predict Aggressive Phenotype and Their Double Positivity Indicates Poor Prognosis of Oral Squamous Cell Carcinoma

Ravindran Caspa Gokulan and Halagowder Devaraj

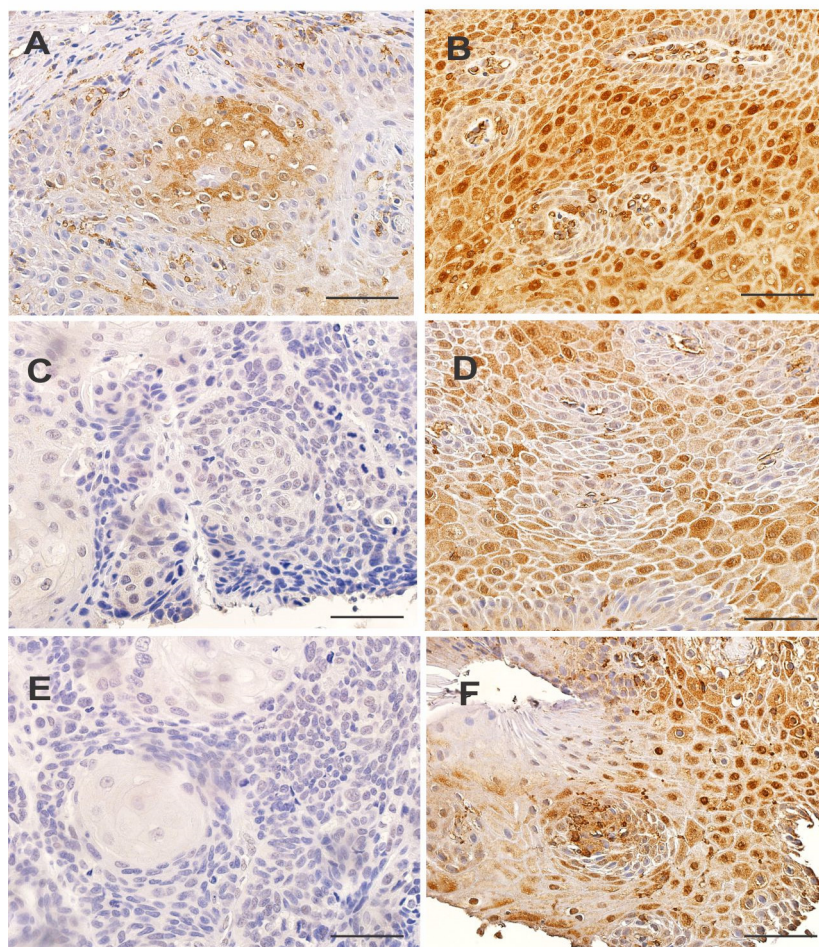

**Figure S1.** Representative images of Immunostaining of CXCR-4 (A & B), PKC- $\delta$  (C & D) and CD133 (E & F) in oral squamous cell carcinoma tissues. The representative images of negative score was provided in the left panel and positive score was provided in the right panel. Scale bar = 20 $\mu$ m.

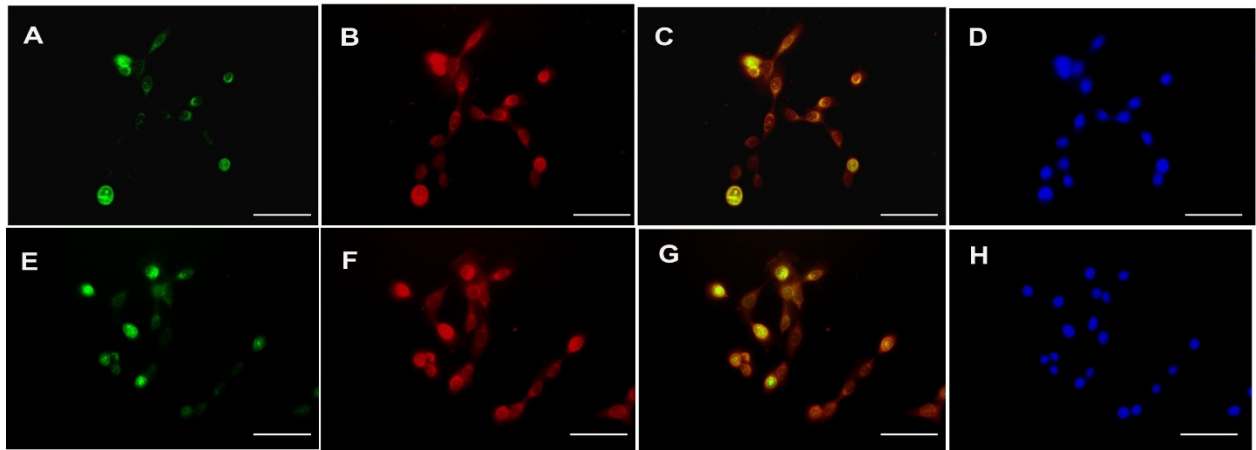

**Figure S2.** Double Immunofluorescence analysis of CXCR-4 with PKC- $\delta$  and CD133 in human esophageal cancer cell line CAL27. Upper panel: CXCR4 (A), PKC- $\delta$  (B), CXCR-4 and PKC- $\delta$  co-localization (C) and DAPI (D) staining in CAL27 cells. Lower panel: CXCR4 (E), CD133 (F), CXCR-4 and CD133 co-localization (G) and DAPI (H) staining in CAL27 cells. (Scale bar - 20 $\mu$ m).

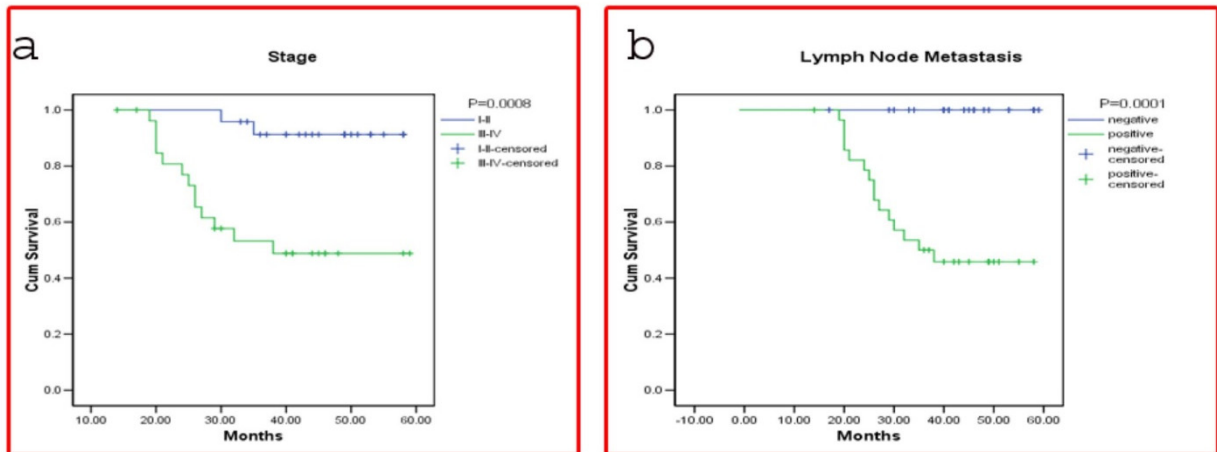

**Figure S3.** Overall survival of patients with oral squamous cell carcinoma according to Stage ( $p=0.0008$ ) (a) and Lymph node metastasis ( $p=0.0001$ ) (b) calculated by the Kaplan-Meier method.

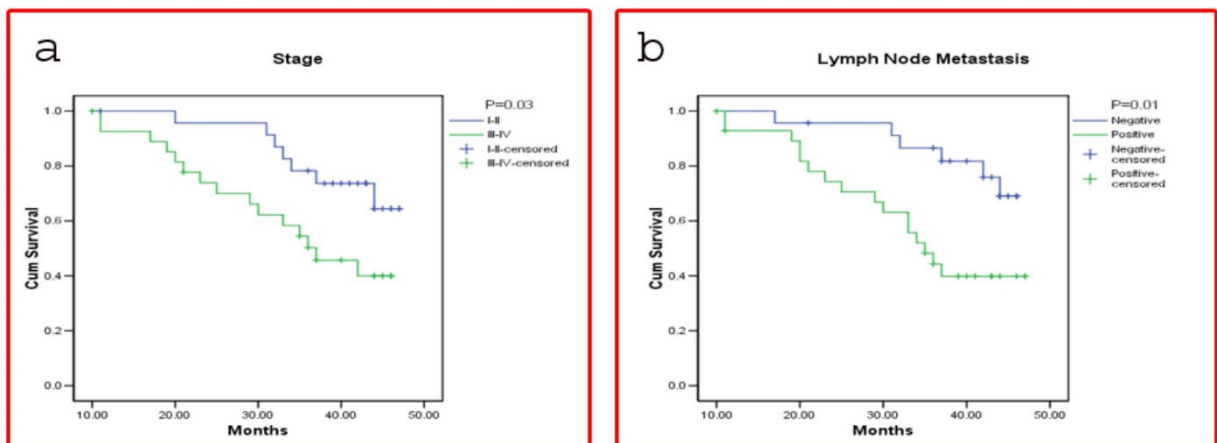

**Figure S4.** Disease-free survival of patients with oral squamous cell carcinoma according to Stage ( $p=0.03$ ) (a) and Lymph node metastasis ( $p=0.01$ ) (b) calculated by the Kaplan-Meier method.
